# Supplementary material for: Effect of Growth Parameters and Annealing Atmosphere on the Properties of Cu2ZnSnS4Thin Films Deposited by Cosputtering
Source: Hindawi journal article supplement (doi:10.1155/2013/690165), 2013-01-01
Supplement: f1 [file 690165.f1.docx]

**H2S+N2**

**Sulphur vapors**

**Gas**

**10min**

**550°C**

**530°C**

**500°C**

**400°C**

**300°C**

**Time**

**Temp.**

**Annealing**

**530°C**

**10min**

**Sulphur vapors**

**25mT, 20mT, 15mT, 10mT, 5mT**

**Working Pressure**

**5mT**

**100W**

**80W**

**60W**

**ZnS**

**80W**

**60W**

**40W**

**30W**

**15W**

**60W**

**30W**

**15W**

**5W**

**SnS**

**Cu**

**Target Power**

**15W**

**30W**

**80W**

**Cu2ZnSnS4 Optimization**

**Kesterite CZTS**

**Figure S1:** Flow chart of optimization of kesterite Cu2ZnSnS4 thin film using co-sputtering.
